# Supplementary material
Source: Research Square preprint supplement (doi:10.21203/rs.3.rs-9148341/v1)
Supplement: Supplementary file 1 [file b22c0516ff45ab0cf12bf6e7.pdf]

# Supplementary information for Improving Reanalysis Hub-Height Wind Speeds and Wind Shear Across Large Spatial Domains Using Near-Surface Observational Networks

Freddy Houndekindo<sup>1\*</sup>, Taha B.M.J. Ouarda<sup>1</sup>

<sup>1</sup>Canada Research Chair in Statistical Hydro-Climatology, Institut national de la recherche scientifique, Centre Eau Terre Environnement, 490 de la Couronne, Québec, QC, G1K 9A9, Canada

\*Corresponding author: Freddy Houndekindo

490, Couronne street, Québec, QC, G1K 9A9, Canada

Tel : +1 418-654-3842

E-mail : [freddy.houndekindo@inrs.ca](mailto:freddy.houndekindo@inrs.ca)

**Table S1.** Information of the Tall Tower Dataset stations used in the study as reference for validation.

| <b>Station name</b> | <b>Longitude (° West)</b> | <b>Latitude (° North)</b> | <b>height above sea level (m)</b> | <b>Standard deviation of orography height</b> |
|---------------------|---------------------------|---------------------------|-----------------------------------|-----------------------------------------------|
| BROOKHAVEN          | -84.337                   | 33.865                    | 308.052                           | 14.759                                        |
| BUTLER GRADE        | -118.683                  | 45.95                     | 543.625                           | 95.134                                        |
| CHINOOK             | -119.534                  | 45.833                    | 156.044                           | 62.942                                        |
| KENNEWICK           | -119.117                  | 46.1                      | 595.388                           | 105.895                                       |
| MEGLER              | -123.877                  | 46.266                    | 338.901                           | 22.062                                        |
| NWTC M2             | -105.235                  | 39.911                    | 1857.351                          | 190.058                                       |
| NWTC M4             | -105.225                  | 39.906                    | 1847.286                          | 190.058                                       |
| NWTC M5             | -105.225                  | 39.206                    | 2338.231                          | 223.05                                        |
| OAK RIDGE           | -84.324                   | 35.926                    | 262.289                           | 81.149                                        |
| OSU                 | -84.714                   | 45.56                     | 248.565                           | 30.83                                         |
| PARK FALLS          | -90.273                   | 45.945                    | 471.03                            | 10.14                                         |
| SEVEN MILE          | -121.267                  | 45.634                    | 289.723                           | 186.304                                       |
| TROUTDALE           | -122.402                  | 45.558                    | 6.477                             | 92.689                                        |
| WASCO               | -120.767                  | 45.5                      | 630.692                           | 110.676                                       |

**Notes:** The height above sea level was estimated from a digital elevation model (DEM). The Standard deviation of orography height is a parameter that characterizes terrain variability unresolved by the ERA5 model grid.

**Table S2.** Assigned aerodynamic surface roughness length ( $z_0$ ) to land cover classes. The table presents the land cover classes and pixel ID derived from The North American land cover map, along with the assigned  $z_0$ .

| <b>Land cover class</b>                               | <b>Pixel ID</b> | <b><math>z_0</math> (in meter)</b> |
|-------------------------------------------------------|-----------------|------------------------------------|
| Temperate or sub-polar needleleaf forest              | 1               | 2.0                                |
| Sub-polar taiga needleleaf forest                     | 2               | 2.0                                |
| Tropical or sub-tropical broadleaf evergreen forest   | 3               | 2.0                                |
| Temperate or sub-polar broadleaf deciduous forest     | 5               | 2.0                                |
| Tropical or sub-tropical shrubland (perennial plants) | 7               | 0.5                                |
| Temperate or sub-polar Shrubland                      | 8               | 0.5                                |
| Tropical or sub-tropical grassland                    | 9               | 0.5                                |
| Temperate or sub-polar grassland                      | 10              | 0.1                                |
| Sub-polar or polar shrubland-lichen-moss              | 11              | 0.03                               |
| Sub-polar or polar grassland-lichen-moss              | 12              | 0.03                               |
| Sub-polar or polar barren-lichen-moss                 | 13              | 0.03                               |
| Wetland                                               | 14              | 0.25                               |
| Cropland                                              | 15              | 0.25                               |
| Barren lands                                          | 16              | 0.03                               |
| Urban                                                 | 17              | 2                                  |
| Water                                                 | 18              | 1e-3                               |
| Snow and ice                                          | 19              | 1.3 10e-3                          |

### Text S1: Monin-Obukhov Similarity theory

Under near-neutral atmospheric conditions over horizontally homogeneous and flat terrain, the logarithmic wind profile provides a reasonable approximation of the vertical variation of wind speed and is given by

$$\bar{u}_z = \frac{u_*}{k} \ln\left(\frac{z}{z_0}\right), \quad (\text{S1})$$

where  $\bar{u}_z$  denotes the time-averaged wind speed at height  $z$ , and  $u_*$  is the friction velocity.

Based on dimensional analysis, MOST extends the logarithmic wind profile to account for the thermal stratification in the atmospheric surface layer [1]. Within the atmospheric surface layer, the dimensionless wind shear and temperature gradient are written as

$$\phi_m\left(\frac{z}{L}\right) = \frac{kz}{u_*} \frac{\partial \bar{u}}{\partial z}, \quad (\text{S2})$$

$$\phi_h\left(\frac{z}{L}\right) = \frac{kz}{\theta_*} \frac{\partial \bar{\theta}}{\partial z}, \quad (\text{S3})$$

where  $\phi_m$ , and  $\phi_h$  are the dimensionless wind shear and temperature gradient, respectively,  $\theta_*$  is the temperature scale. The Obukhov length scale,  $L$ , is defined as follows:

$$L = -\frac{u_*^3 \bar{\theta}_m}{kg \overline{(w'\theta')}}_s, \quad (\text{S4})$$

where  $\bar{\theta}_m$  is the mean potential temperature,  $g$  is the acceleration due to gravity, and  $\overline{(w'\theta')}}_s$  is the surface sensible heat flux. Negative value of  $L$  corresponds to unstable conditions characterized by a positive upward heat flux with buoyancy-driven turbulence, whereas positive values indicate stable stratification due to radiative cooling with buoyancy-suppressed turbulence. In the limit  $L \rightarrow \infty$ , the ABL approaches neutral stability.

Integrating Equation (S2) between height  $z_1$  and  $z_2$  yields

$$\bar{u}_2 - \bar{u}_1 = \frac{u_*}{k} \left[ \ln\left(\frac{z_2}{z_1}\right) - \psi_m\left(\frac{z_2}{L}\right) + \psi_m\left(\frac{z_1}{L}\right) \right], \quad (\text{S5})$$

where  $\psi_m$  is the integrated stability correction function for momentum defined as follows:

$$\psi_m\left(\frac{z}{L}\right) = \int_0^{\frac{z}{L}} \frac{1 - \phi_m(\xi)}{\xi} d\xi, \quad (\text{S6})$$

with  $\xi = \frac{z}{L}$ .

Setting  $z_1 = z_0$  leads to

$$\bar{u}_z = \frac{u_*}{k} \left[ \ln\left(\frac{z}{z_0}\right) - \psi_m\left(\frac{z}{L}\right) + \psi_m\left(\frac{z_0}{L}\right) \right]. \quad (\text{S7})$$

Although estimating  $z_0$  is challenging [2], Equation (S7) remains useful when only a single wind speed measurement is available. If measurements are available at two heights, Equation (S5) can be directly applied without the need to estimate  $z_0$ .

Similarly, integrating the heat similarity between  $z_1$  and  $z_2$  gives

$$\bar{\theta}_2 - \bar{\theta}_1 = \frac{\theta_*}{k} \left[ \ln\left(\frac{z_2}{z_1}\right) - \psi_h\left(\frac{z_2}{L}\right) + \psi_h\left(\frac{z_1}{L}\right) \right], \quad (\text{S8})$$

where the temperature similarity function  $\psi_h$  is defined as

$$\psi_h\left(\frac{z}{L}\right) = \int_0^{\frac{z}{L}} \frac{1 - \phi_h(\xi)}{\xi} d\xi. \quad (\text{S9})$$

Several forms of  $\phi_{m,h}$  have been proposed in the literature based on different experimental datasets [3]. For unstable conditions ( $L < 0$ ), we adopt the commonly used formulation of Dyer and Hicks [4], expressed as follows:

$$\phi_m = (1 - 16\xi)^{-\frac{1}{4}}, \quad \phi_h = (1 - 16\xi)^{-\frac{1}{2}}, \quad (\text{S10})$$

with the corresponding integrated forms given by

$$\psi_m = 2\ln\left(\frac{1+x}{2}\right) + \ln\left(\frac{1+x^2}{2}\right) - 2\tan^{-1}(x) + \frac{\pi}{2}, \quad \psi_h = 2\ln\left(\frac{1+x^2}{2}\right), \quad (\text{S11})$$

where  $x = (1 - 16\xi)^{\frac{1}{4}}$ .

Under stable conditions ( $L > 0$ ), the parameterization of Beljaars and Holtslag [5] is used:

$$\phi_m = 1 + a\xi + b\xi(1 + c - d\xi)\exp(-d\xi), \quad (\text{S12})$$

with constants  $a = 1$ ,  $b = 2/3$ ,  $c = 5$ , and  $d = 0.35$ . The corresponding integrated similarity functions are given by

$$\psi_m = -b \left( \xi - \frac{c}{d} \right) \exp(-d\xi) - a\xi - \frac{bc}{d}, \quad (\text{S13})$$

$$\psi_h = -b \left( \xi - \frac{c}{d} \right) \exp(-d\xi) - \left( 1 + \frac{2}{3} a\xi \right)^{\frac{3}{2}} - \frac{bc}{d} + 1. \quad (\text{S14})$$

Estimating the flux quantities required to determine the Monin–Obukhov length remains challenging [6]. As an alternative, atmospheric stability may be characterized using the gradient Richardson number [2] defined as follows:

$$\text{Ri} = \frac{g}{\bar{\theta}_m} \frac{\frac{\partial \bar{\theta}}{\partial z}}{\left( \frac{\partial \bar{u}}{\partial z} \right)^2} \quad (\text{S15})$$

Between two temperature measurement heights,  $z_{t_1}$  and  $z_{t_2}$ , the vertical temperature gradient can be approximated at the geometric mean height  $z_{t_m} = \sqrt{z_{t_1} z_{t_2}}$  by assuming a logarithmic profile and applying a finite-difference approximation [7]:

$$\frac{\partial \bar{\theta}}{\partial z} = \frac{\Delta \bar{\theta}}{z_{t_m} \ln(z_{t_2}/z_{t_1})}, \quad (\text{S16})$$

where  $\Delta \bar{\theta} = \bar{\theta}_2 - \bar{\theta}_1$ .

Applying a similar approximation for the wind speed gradient yields the bulk Richardson number,

$$\text{Ri}_b = \frac{g}{\bar{\theta}_m} \frac{\Delta \bar{\theta}}{(\Delta \bar{u})^2} \frac{[z_{u_m} \ln(z_{u_2}/z_{u_1})]^2}{z_{t_m} \ln(z_{t_2}/z_{t_1})}, \quad (\text{S17})$$

where  $\Delta \bar{u} = \bar{u}_2 - \bar{u}_1$ , and  $z_{u_m}$  is the geometric mean wind measurement height. The potential temperature difference is approximated as

$$\Delta \bar{\theta} = \Delta \bar{T} + \Gamma_d \Delta z, \quad (\text{S18})$$

with  $\Gamma_d = 0.0098 \text{ Km}^{-1}$  denoting the dry adiabatic lapse rate [8].

Finally, by combining Equations (S4), (S5), (S8), and (S17), the Monin–Obukhov length can be expressed as a function of the bulk Richardson number, given by

$$Ri_b = \frac{z_{Ri}}{L} \frac{\left[ \ln\left(\frac{z_{t_2}}{z_{t_1}}\right) - \psi_h\left(\frac{z_{t_2}}{L}\right) + \psi_h\left(\frac{z_{t_1}}{L}\right) \right]}{\left[ \ln\left(\frac{z_{u_2}}{z_{u_1}}\right) - \psi_m\left(\frac{z_{u_2}}{L}\right) + \psi_m\left(\frac{z_{u_1}}{L}\right) \right]^2}, \quad (S19)$$

where  $Ri_b$  denotes bulk Richardson number and  $z_{Ri} = \frac{[z_{u_m} \ln(z_{u_2}/z_{u_1})]^2}{z_{t_m} \ln(z_{t_2}/z_{t_1})}$ . Equation (S19) is transcendental in  $L$  and must be solved iteratively.

## References

1. Foken T, Mauder M. *Micrometeorology*: Springer; 2008.
2. Brotzge JA, Crawford KC. Estimating Sensible Heat Flux from the Oklahoma Mesonet. *Journal of Applied Meteorology*. 2000;39(1):102-16.
3. Högström U. Non-dimensional wind and temperature profiles in the atmospheric surface layer: A re-evaluation. *Boundary-Layer Meteorology*. 1988;42(1):55-78.
4. Dyer AJ, Hicks BB. Flux-gradient relationships in the constant flux layer. *Quarterly Journal of the Royal Meteorological Society*. 1970;96(410):715-21.
5. Beljaars ACM, Holtslag AAM. Flux Parameterization over Land Surfaces for Atmospheric Models. *Journal of Applied Meteorology and Climatology*. 1991;30(3):327-41.
6. Lee TR, Buban M, Meyers TP. Application of Bulk Richardson Parameterizations of Surface Fluxes to Heterogeneous Land Surfaces. *Monthly Weather Review*. 2021;149(10):3243-64.
7. Arya PS. *Introduction to Micrometeorology*: Academic Press; 2001.
8. Stull R. *Practical Meteorology: An Algebra-based Survey of Atmospheric Science*. British Columbia.: Univ. of British Columbia.; 2018. 940 p.

## Text S2: Theoretical wind shear exponent

For engineering applications, the power-law is commonly used to extrapolate wind speed from a reference height  $z_1$  to target hub height  $z_2$ :

$$\bar{u}_2 = \bar{u}_1 \left( \frac{z_2}{z_1} \right)^\alpha, \quad (\text{S20})$$

where  $\alpha$  is the shear exponent, which depends on atmospheric stability and surface roughness.

In practice,  $\alpha$  is assumed constant, with a typical value of  $\alpha = 1/7$ , corresponding to neutral atmospheric stability conditions over a flat terrain. Alternatively, a stability and surface roughness dependent shear exponent  $\alpha$  can be derived from MOST [1, 2] as follows:

$$\alpha = \left( \frac{u_*}{\bar{u}_z k} \right) \phi_m \left( \frac{z}{L} \right). \quad (\text{S21})$$

Because  $\bar{u}_z$  at the extrapolation height is unknown, it can be estimated using the integrated wind profile between  $z_1$  and  $z$  as follows:

$$\alpha = \left\{ \frac{u_*}{ku_1 + u_* \left[ \ln \left( \frac{z}{z_1} \right) - \psi_m \left( \frac{z}{L} \right) + \psi_m \left( \frac{z_1}{L} \right) \right]} \right\} \phi_m \left( \frac{z}{L} \right). \quad (\text{S22})$$

If the reference height is set equal to the roughness length ( $z_1 = z_0$ ), the shear exponent simplifies to

$$\alpha = \frac{\phi_m \left( \frac{z}{L} \right)}{\ln \left( \frac{z}{z_0} \right) - \psi_m \left( \frac{z}{L} \right) + \psi_m \left( \frac{z_0}{L} \right)}. \quad (\text{S23})$$

This MOST formulation of the shear exponent indicates that the WSE is height dependent. For practical applications, a representative shear exponent between two heights  $z_2$  and  $z_3$  can be estimated at an height  $z_m$  [1]:

$$\alpha = \left\{ \frac{u_*}{ku_1 + u_* \left[ \ln \left( \frac{z_m}{z_1} \right) - \psi_m \left( \frac{z_m}{L} \right) + \psi_m \left( \frac{z_1}{L} \right) \right]} \right\} \phi_m \left( \frac{z_m}{L} \right), \quad (\text{S24})$$

where  $z_m = \frac{1}{2} \left[ \left( \frac{z_2 + z_3}{2} \right) + \sqrt{z_2 z_3} \right]$ .

## References

1. Irwin JS. A theoretical variation of the wind profile power-law exponent as a function of surface roughness and stability. *Atmospheric Environment* (1967). 1979;13(1):191-4.
2. Panofsky HA, Blackadar AK, McVehil GE. The diabatic wind profile. *Quarterly Journal of the Royal Meteorological Society*. 1960;86(369):390-8.

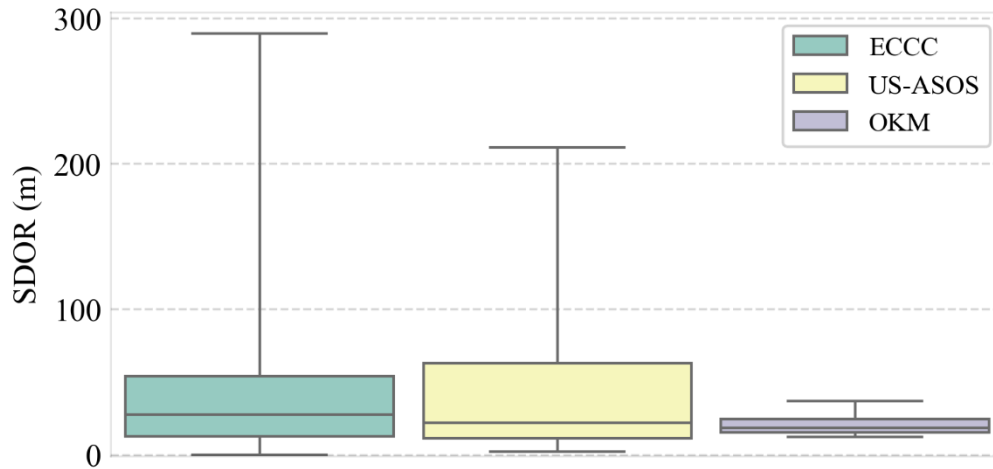

**Figure S1. Boxplot of standard deviation of orography height (SDOR) for ECCC, US-ASOS, and OKM.** The SDOR is one of the ERA5 geophysical datasets used to parametrize sub-grid-scale processes and is used in this study as a measure of terrain complexity within the station grid cell.

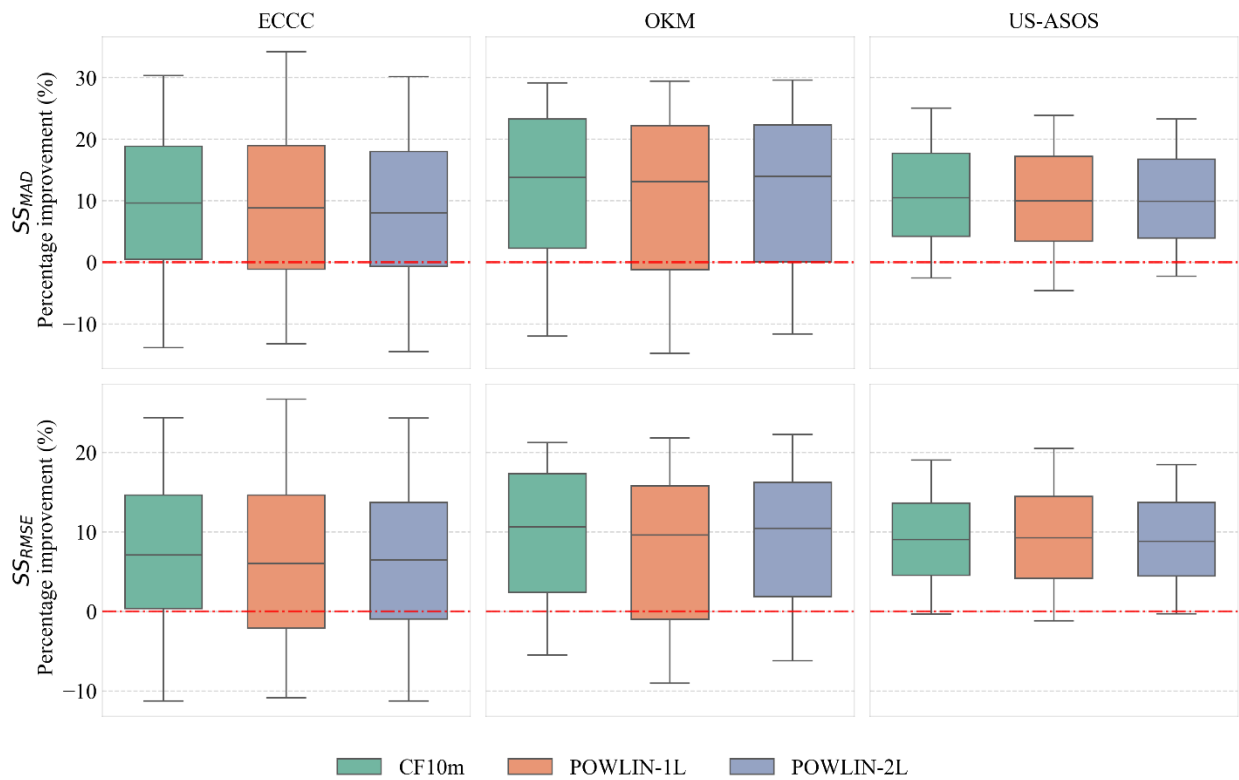

**Figure S2. Boxplot of skill scores for CF10m, POWLIN-1L, and POWLIN-2L.** Overall, the different model configurations led to positive skill scores at most stations, indicating an improvement relative to ERA5. The improvements in MAD and RMSE are generally more pronounced with lower variability at the US-ASOS stations. The magnitude and variability of the improvement remain relatively consistent across the different model configurations.

**Table S3.** Skill scores stratified by ecoregion [1] for the ECCC, US-ASOS, and OKM station networks.

| Ecoregion                       | Metrics                       | CF10m          | POWLIN-1L      | POWLIN-2L      | N   |
|---------------------------------|-------------------------------|----------------|----------------|----------------|-----|
| Arctic Cordillera               | N(SS <sub>MAD</sub> > 0) (%)  | <b>100.000</b> | <b>100.000</b> | <b>100.000</b> | 1   |
|                                 | N(SS <sub>RMSE</sub> > 0) (%) | <b>100.000</b> | <b>100.000</b> | <b>100.000</b> | 1   |
|                                 | SS <sub>MAD</sub> (%)         | <b>18.958</b>  | 13.839         | 17.354         | 1   |
|                                 | SS <sub>RMSE</sub> (%)        | <b>20.633</b>  | 11.876         | 18.692         | 1   |
| Coastal                         | N(SS <sub>MAD</sub> > 0) (%)  | 56.627         | 57.831         | <b>65.060</b>  | 83  |
|                                 | N(SS <sub>RMSE</sub> > 0) (%) | <b>62.651</b>  | 61.446         | <b>62.651</b>  | 83  |
|                                 | SS <sub>MAD</sub> (%)         | <b>4.997</b>   | 3.988          | 3.381          | 83  |
|                                 | SS <sub>RMSE</sub> (%)        | 3.075          | 4.561          | <b>5.098</b>   | 83  |
| Eastern Temperate Forests       | N(SS <sub>MAD</sub> > 0) (%)  | 87.026         | 86.627         | <b>87.425</b>  | 501 |
|                                 | N(SS <sub>RMSE</sub> > 0) (%) | <b>90.818</b>  | 90.619         | <b>90.818</b>  | 501 |
|                                 | SS <sub>MAD</sub> (%)         | <b>14.202</b>  | 13.552         | 12.778         | 501 |
|                                 | SS <sub>RMSE</sub> (%)        | 11.234         | <b>11.511</b>  | 10.862         | 501 |
| Great Plains                    | N(SS <sub>MAD</sub> > 0) (%)  | <b>81.356</b>  | 76.998         | 77.240         | 413 |
|                                 | N(SS <sub>RMSE</sub> > 0) (%) | <b>85.230</b>  | 77.966         | 81.114         | 413 |
|                                 | SS <sub>MAD</sub> (%)         | <b>8.336</b>   | 7.104          | 7.380          | 413 |
|                                 | SS <sub>RMSE</sub> (%)        | <b>7.189</b>   | 6.469          | 6.867          | 413 |
| Hudson Plains                   | N(SS <sub>MAD</sub> > 0) (%)  | 55.556         | <b>66.667</b>  | <b>66.667</b>  | 9   |
|                                 | N(SS <sub>RMSE</sub> > 0) (%) | 66.667         | 66.667         | <b>77.778</b>  | 9   |
|                                 | SS <sub>MAD</sub> (%)         | <b>11.683</b>  | 9.003          | 7.353          | 9   |
|                                 | SS <sub>RMSE</sub> (%)        | 3.880          | <b>8.665</b>   | 6.886          | 9   |
| Marine West Coast Forests       | N(SS <sub>MAD</sub> > 0) (%)  | <b>87.037</b>  | 83.333         | 83.333         | 54  |
|                                 | N(SS <sub>RMSE</sub> > 0) (%) | <b>81.481</b>  | 75.926         | 75.926         | 54  |
|                                 | SS <sub>MAD</sub> (%)         | <b>11.908</b>  | 11.217         | 11.151         | 54  |
|                                 | SS <sub>RMSE</sub> (%)        | 6.597          | <b>6.937</b>   | 5.932          | 54  |
| Mediterranean California        | N(SS <sub>MAD</sub> > 0) (%)  | <b>94.737</b>  | 89.474         | 92.982         | 57  |
|                                 | N(SS <sub>RMSE</sub> > 0) (%) | 91.228         | 87.719         | <b>92.982</b>  | 57  |
|                                 | SS <sub>MAD</sub> (%)         | 13.663         | <b>14.259</b>  | 14.153         | 57  |
|                                 | SS <sub>RMSE</sub> (%)        | 10.521         | <b>11.588</b>  | 11.243         | 57  |
| North American Deserts          | N(SS <sub>MAD</sub> > 0) (%)  | <b>81.481</b>  | <b>81.481</b>  | 79.630         | 108 |
|                                 | N(SS <sub>RMSE</sub> > 0) (%) | 82.407         | <b>86.111</b>  | 83.333         | 108 |
|                                 | SS <sub>MAD</sub> (%)         | 6.492          | 6.320          | <b>6.732</b>   | 108 |
|                                 | SS <sub>RMSE</sub> (%)        | 6.309          | <b>6.860</b>   | 6.378          | 108 |
| Northern Forests                | N(SS <sub>MAD</sub> > 0) (%)  | <b>76.953</b>  | 71.484         | 71.875         | 256 |
|                                 | N(SS <sub>RMSE</sub> > 0) (%) | <b>75.000</b>  | 68.359         | 71.484         | 256 |
|                                 | SS <sub>MAD</sub> (%)         | <b>10.712</b>  | 8.984          | 9.321          | 256 |
|                                 | SS <sub>RMSE</sub> (%)        | <b>7.697</b>   | 5.483          | 6.302          | 256 |
| Northwestern Forested Mountains | N(SS <sub>MAD</sub> > 0) (%)  | <b>71.831</b>  | 64.789         | <b>71.831</b>  | 71  |
|                                 | N(SS <sub>RMSE</sub> > 0) (%) | 63.380         | <b>66.197</b>  | <b>66.197</b>  | 71  |
|                                 | SS <sub>MAD</sub> (%)         | <b>7.662</b>   | 7.417          | 6.968          | 71  |
|                                 | SS <sub>RMSE</sub> (%)        | 3.940          | <b>4.551</b>   | 3.989          | 71  |

|                              |                               |                |                |                |    |
|------------------------------|-------------------------------|----------------|----------------|----------------|----|
| Southern Semi-Arid Highlands | N(SS <sub>MAD</sub> > 0) (%)  | <b>50.000</b>  | <b>50.000</b>  | <b>50.000</b>  | 2  |
|                              | N(SS <sub>RMSE</sub> > 0) (%) | <b>100.000</b> | <b>100.000</b> | <b>100.000</b> | 2  |
|                              | SS <sub>MAD</sub> (%)         | 2.583          | <b>4.206</b>   | 2.354          | 2  |
|                              | SS <sub>RMSE</sub> (%)        | 3.540          | <b>4.978</b>   | 4.355          | 2  |
| Taiga                        | N(SS <sub>MAD</sub> > 0) (%)  | 80.000         | <b>86.667</b>  | <b>86.667</b>  | 15 |
|                              | N(SS <sub>RMSE</sub> > 0) (%) | <b>86.667</b>  | <b>86.667</b>  | <b>86.667</b>  | 15 |
|                              | SS <sub>MAD</sub> (%)         | 9.132          | <b>9.629</b>   | 7.867          | 15 |
|                              | SS <sub>RMSE</sub> (%)        | <b>7.731</b>   | 6.434          | 6.618          | 15 |
| Temperate Sierras            | N(SS <sub>MAD</sub> > 0) (%)  | <b>100.000</b> | <b>100.000</b> | <b>100.000</b> | 2  |
|                              | N(SS <sub>RMSE</sub> > 0) (%) | <b>100.000</b> | <b>100.000</b> | <b>100.000</b> | 2  |
|                              | SS <sub>MAD</sub> (%)         | 10.890         | 5.581          | <b>13.544</b>  | 2  |
|                              | SS <sub>RMSE</sub> (%)        | 7.616          | 6.528          | <b>8.994</b>   | 2  |
| Tropical Humid Forests       | N(SS <sub>MAD</sub> > 0) (%)  | <b>100.000</b> | 72.727         | <b>100.000</b> | 11 |
|                              | N(SS <sub>RMSE</sub> > 0) (%) | <b>100.000</b> | 81.818         | <b>100.000</b> | 11 |
|                              | SS <sub>MAD</sub> (%)         | <b>17.445</b>  | 11.173         | 17.323         | 11 |
|                              | SS <sub>RMSE</sub> (%)        | 13.192         | 8.224          | <b>15.145</b>  | 11 |
| Tundra                       | N(SS <sub>MAD</sub> > 0) (%)  | 0.000          | 0.000          | 0.000          | 3  |
|                              | N(SS <sub>RMSE</sub> > 0) (%) | 0.000          | 0.000          | 0.000          | 3  |
|                              | SS <sub>MAD</sub> (%)         | -12.660        | -9.395         | -11.552        | 3  |
|                              | SS <sub>RMSE</sub> (%)        | -7.834         | -7.931         | -5.602         | 3  |

**Notes:** The best values for each network, metric, and ecoregion are in boldface. SS<sub>MAD</sub> and SS<sub>RMSE</sub> denote the skill scores computed using ERA5 as the reference baseline. N(SS<sub>MAD</sub> > 0) and N(SS<sub>RMSE</sub> > 0) represent the proportion of stations for which the skill score is positive.

## References

1. North American Environmental Atlas - Terrestrial Ecoregions: Level I [Internet]. Commission for Environmental Cooperation (CEC) 2021 [cited 2026/05/13]. Available from: <https://www.cec.org/north-american-environmental-atlas/terrestrial-ecoregions-level-i/>.

**Table S4.** Median values of the performance metrics computed across the different models, height intervals, and atmospheric stability regimes at the TALLDB stations.

| Height interval       | Metrics | Stability regime | CF10m        | ERA5  | POWLIN-1L    | POWLIN-2L    |
|-----------------------|---------|------------------|--------------|-------|--------------|--------------|
| <b>10-40 m a.g.l</b>  | CRMSE   | Neutral          | 2.901        | 3.148 | 2.921        | <b>2.866</b> |
|                       |         | Stable           | 1.749        | 1.816 | <b>1.724</b> | 1.727        |
|                       |         | Unstable         | 1.79         | 1.845 | 1.785        | <b>1.772</b> |
|                       | MAD     | Neutral          | 1.904        | 2.115 | <b>1.768</b> | 1.784        |
|                       |         | Stable           | 1.017        | 1.643 | <b>0.995</b> | 1.114        |
|                       |         | Unstable         | 1.13         | 1.357 | <b>1.082</b> | 1.09         |
|                       | PCC     | Neutral          | <b>0.554</b> | 0.455 | 0.541        | 0.552        |
|                       |         | Stable           | 0.377        | 0.309 | <b>0.387</b> | 0.378        |
|                       |         | Unstable         | <b>0.506</b> | 0.404 | 0.505        | 0.51         |
|                       | RMSE    | Neutral          | 3.278        | 3.933 | <b>3.263</b> | 3.313        |
|                       |         | Stable           | 1.873        | 2.334 | <b>1.843</b> | 1.86         |
|                       |         | Unstable         | 1.925        | 2.362 | 1.901        | <b>1.867</b> |
| <b>40-100 m a.g.l</b> | CRMSE   | Neutral          | 3.613        | 3.462 | <b>3.436</b> | 3.554        |
|                       |         | Stable           | 2.59         | 2.313 | <b>2.182</b> | 2.428        |
|                       |         | Unstable         | 2.216        | 2.218 | <b>2.125</b> | 2.153        |
|                       | MAD     | Neutral          | 2.288        | 2.311 | <b>2.083</b> | 2.242        |
|                       |         | Stable           | 1.43         | 1.694 | <b>1.294</b> | 1.4          |
|                       |         | Unstable         | 1.333        | 1.4   | <b>1.201</b> | 1.275        |
|                       | PCC     | Neutral          | 0.511        | 0.485 | 0.508        | <b>0.525</b> |
|                       |         | Stable           | 0.307        | 0.318 | <b>0.376</b> | 0.319        |
|                       |         | Unstable         | 0.483        | 0.385 | 0.484        | <b>0.49</b>  |
|                       | RMSE    | Neutral          | 3.794        | 3.877 | <b>3.578</b> | 3.791        |
|                       |         | Stable           | 2.653        | 2.857 | <b>2.271</b> | 2.52         |
|                       |         | Unstable         | 2.31         | 2.62  | <b>2.145</b> | 2.179        |

**Note:** The ERA5 Monin–Obukhov length was used to classify atmospheric stability into three regimes [1]: unstable ( $-0.5 < L^{-1} < -0.002$ ), neutral ( $-0.002 \leq L^{-1} \leq 0.002$ ) and, stable conditions ( $0.002 < L^{-1} < 0.5$ ). The values of the best-performing model for each height interval and metric are in boldface.

## References

1. Debnath M, Moriarty P, Krishnamurthy R, Bodini N, Newsom R, Quon E, et al. Characterization of wind speed and directional shear at the AWAKEN field campaign site. *Journal of Renewable and Sustainable Energy*. 2023;15(3):033308.

**Table S5.** Performance metrics computed at each Tall Tower Dataset station

| Station name | Height | CRMSE        |             |              |              | MAD          |              |              |              | PCC          |              |              |              | RMSE         |              |              |              |
|--------------|--------|--------------|-------------|--------------|--------------|--------------|--------------|--------------|--------------|--------------|--------------|--------------|--------------|--------------|--------------|--------------|--------------|
|              |        | CF10m        | ERA5        | POWLIN-1L    | POWLIN-2L    | CF10m        | ERA5         | POWLIN-1L    | POWLIN-2L    | CF10m        | ERA5         | POWLIN-1L    | POWLIN-2L    | CF10m        | ERA5         | POWLIN1L     | POWLIN-2L    |
| BROOKHAVEN   | 10     | 1.816        | <b>1.74</b> | 1.757        | 1.78         | 1.129        | 1.179        | <b>1.067</b> | 1.101        | 0.28         | 0.186        | <b>0.283</b> | 0.28         | 2.011        | 1.933        | <b>1.931</b> | 1.981        |
|              | 50     | 2.614        | 2.561       | <b>2.396</b> | 2.455        | 1.736        | 1.645        | <b>1.586</b> | 1.598        | <b>0.174</b> | 0.134        | 0.167        | 0.16         | 2.619        | 2.563        | <b>2.416</b> | 2.455        |
|              | 85     | 3.199        | 3.086       | <b>2.927</b> | 3.11         | 2.361        | <b>2.115</b> | 2.211        | 2.205        | 0.129        | <b>0.15</b>  | 0.136        | 0.129        | 3.405        | <b>3.196</b> | 3.215        | 3.244        |
| BUTLER GRADE | 31     | 2.986        | 3.081       | <b>2.947</b> | 3.132        | 2.15         | 3.095        | <b>2.012</b> | 2.095        | 0.801        | <b>0.826</b> | 0.81         | 0.782        | 3.755        | 4.704        | <b>3.525</b> | 3.727        |
|              | 45     | <b>2.971</b> | 3.087       | 2.984        | 3.115        | 2.027        | 2.913        | <b>1.956</b> | 2.011        | 0.819        | <b>0.841</b> | 0.823        | 0.806        | 3.593        | 4.598        | <b>3.461</b> | 3.585        |
|              | 62     | <b>2.942</b> | 3.065       | 3.007        | 2.946        | 1.98         | 2.828        | 1.945        | <b>1.893</b> | 0.831        | <b>0.852</b> | 0.83         | 0.836        | 3.46         | 4.512        | <b>3.426</b> | 3.313        |
| CHINOOK      | 50     | 1.969        | 1.899       | <b>1.85</b>  | 1.882        | 1.3          | <b>1.188</b> | 1.232        | 1.311        | 0.832        | 0.827        | <b>0.843</b> | 0.84         | 2.284        | <b>1.927</b> | 2.112        | 2.221        |
| KENNEWICK    | 24     | 3.694        | 3.851       | <b>3.651</b> | 3.814        | 2.796        | 3.891        | <b>2.492</b> | 2.638        | 0.745        | <b>0.768</b> | 0.753        | 0.722        | 5.033        | 6.1          | <b>4.721</b> | 5.009        |
|              | 37     | <b>3.203</b> | 3.266       | 3.215        | 3.371        | 2.208        | 3.209        | <b>2.046</b> | 2.153        | 0.738        | <b>0.763</b> | 0.737        | 0.706        | 3.927        | 4.963        | <b>3.787</b> | 4.055        |
| MEGLER       | 53     | 1.965        | 2.042       | <b>1.878</b> | 1.892        | 1.155        | 1.34         | <b>1.1</b>   | 1.152        | 0.752        | <b>0.777</b> | 0.752        | 0.755        | 1.968        | 2.144        | <b>1.912</b> | 1.892        |
| NWTM2        | 10     | <b>2.218</b> | 2.418       | 2.223        | 2.22         | 0.955        | 1.234        | <b>0.941</b> | 1.011        | <b>0.555</b> | 0.413        | 0.549        | 0.551        | 2.271        | 2.812        | 2.361        | <b>2.24</b>  |
|              | 20     | <b>2.406</b> | 2.587       | 2.429        | 2.431        | 1.081        | 1.356        | <b>1.05</b>  | 1.107        | <b>0.567</b> | 0.463        | 0.559        | 0.558        | <b>2.458</b> | 3.034        | 2.6          | 2.462        |
|              | 50     | 2.76         | 2.858       | 2.745        | <b>2.728</b> | 1.326        | 1.588        | <b>1.241</b> | 1.251        | 0.559        | 0.512        | 0.573        | <b>0.574</b> | 2.817        | 3.41         | 2.997        | <b>2.798</b> |
| NWTM4        | 80     | 2.975        | 2.959       | <b>2.872</b> | 2.916        | 1.482        | 1.645        | <b>1.324</b> | 1.428        | 0.537        | 0.526        | <b>0.572</b> | 0.551        | 3.003        | 3.488        | 3.115        | <b>2.962</b> |
|              | 10     | <b>2.087</b> | 2.288       | 2.092        | 2.093        | 1.039        | 1.398        | <b>1.035</b> | 1.142        | <b>0.554</b> | 0.41         | 0.553        | 0.551        | 2.088        | 2.832        | 2.106        | <b>2.103</b> |
|              | 100    | 3.195        | 3.005       | <b>2.924</b> | 3.149        | 1.829        | 1.713        | <b>1.493</b> | 1.754        | 0.518        | 0.52         | <b>0.556</b> | 0.526        | 3.249        | 3.54         | <b>2.945</b> | 3.175        |
|              | 15     | <b>2.362</b> | 2.542       | 2.375        | 2.375        | 1.207        | 1.531        | <b>1.167</b> | 1.262        | <b>0.55</b>  | 0.439        | 0.544        | 0.543        | <b>2.365</b> | 3.146        | 2.402        | 2.377        |
|              | 26     | <b>2.46</b>  | 2.626       | 2.466        | 2.479        | 1.33         | 1.561        | <b>1.222</b> | 1.348        | <b>0.568</b> | 0.477        | 0.564        | 0.558        | <b>2.461</b> | 3.219        | 2.492        | 2.482        |
|              | 30     | 2.456        | 2.575       | <b>2.438</b> | 2.445        | 1.386        | 1.592        | <b>1.264</b> | 1.387        | <b>0.541</b> | 0.457        | <b>0.541</b> | 0.536        | 2.459        | 3.155        | 2.459        | <b>2.451</b> |
|              | 50     | 2.884        | 2.955       | 2.828        | <b>2.818</b> | 1.6          | 1.777        | <b>1.414</b> | 1.524        | 0.543        | 0.495        | 0.554        | <b>0.558</b> | 2.884        | 3.626        | 2.887        | <b>2.818</b> |
|              | 76     | 3.072        | 3.013       | <b>2.915</b> | 2.971        | 1.74         | 1.764        | <b>1.475</b> | 1.651        | 0.527        | 0.51         | <b>0.554</b> | 0.545        | 3.087        | 3.633        | <b>2.958</b> | 2.973        |
| NWTM5        | 80     | 3.059        | 3.024       | <b>2.912</b> | 2.969        | 1.734        | 1.677        | <b>1.475</b> | 1.653        | 0.547        | 0.527        | <b>0.574</b> | 0.563        | 3.083        | 3.585        | <b>2.941</b> | 2.977        |
|              | 88     | 3.046        | 2.949       | <b>2.849</b> | 2.969        | 1.748        | 1.659        | <b>1.469</b> | 1.67         | 0.544        | 0.533        | <b>0.576</b> | 0.557        | 3.088        | 3.491        | <b>2.871</b> | 2.987        |
|              | 10     | <b>2.184</b> | 2.237       | 2.227        | 2.203        | <b>1.046</b> | 1.328        | 1.088        | 1.047        | <b>0.413</b> | 0.337        | 0.399        | 0.403        | <b>2.229</b> | 2.737        | 2.266        | 2.232        |
|              | 100    | 3.494        | 3.22        | <b>3.179</b> | 3.535        | 1.993        | 1.809        | <b>1.748</b> | 2.007        | 0.362        | 0.352        | <b>0.382</b> | 0.349        | 3.528        | 3.514        | <b>3.184</b> | 3.576        |
|              | 15     | <b>2.4</b>   | 2.418       | 2.423        | <b>2.4</b>   | 1.235        | 1.389        | 1.24         | <b>1.208</b> | <b>0.379</b> | 0.318        | 0.365        | 0.368        | <b>2.418</b> | 2.861        | 2.449        | 2.419        |
|              | 30     | 2.786        | 2.791       | 2.757        | <b>2.749</b> | 1.457        | 1.607        | 1.399        | <b>1.366</b> | <b>0.407</b> | 0.36         | 0.402        | 0.399        | 2.807        | 3.307        | 2.818        | <b>2.8</b>   |
|              | 38     | 2.814        | 2.782       | 2.746        | <b>2.734</b> | 1.509        | 1.613        | 1.421        | <b>1.389</b> | <b>0.407</b> | 0.363        | <b>0.407</b> | 0.405        | 2.818        | 3.244        | 2.786        | <b>2.765</b> |

|            |     |       |              |              |              |              |       |              |              |              |              |              |              |              |       |              |              |
|------------|-----|-------|--------------|--------------|--------------|--------------|-------|--------------|--------------|--------------|--------------|--------------|--------------|--------------|-------|--------------|--------------|
|            | 41  | 3.056 | 2.99         | 2.973        | <b>2.956</b> | 1.679        | 1.733 | 1.579        | <b>1.546</b> | <b>0.35</b>  | 0.307        | 0.346        | 0.346        | 3.068        | 3.494 | 3.035        | <b>3.007</b> |
|            | 55  | 3.106 | 3.026        | <b>2.982</b> | 3.012        | 1.686        | 1.711 | <b>1.544</b> | 1.581        | 0.397        | 0.365        | <b>0.405</b> | 0.399        | 3.107        | 3.472 | <b>3.022</b> | 3.023        |
|            | 61  | 3.211 | 3.084        | <b>3.051</b> | 3.114        | 1.795        | 1.731 | <b>1.624</b> | 1.703        | 0.374        | 0.347        | <b>0.383</b> | 0.374        | 3.212        | 3.467 | <b>3.074</b> | 3.115        |
|            | 74  | 3.277 | 3.124        | <b>3.075</b> | 3.211        | 1.81         | 1.745 | <b>1.612</b> | 1.758        | 0.368        | 0.35         | <b>0.387</b> | 0.365        | 3.279        | 3.506 | <b>3.102</b> | 3.212        |
|            | 80  | 3.366 | 3.204        | <b>3.156</b> | 3.32         | 1.855        | 1.77  | <b>1.656</b> | 1.822        | 0.389        | 0.37         | <b>0.405</b> | 0.384        | 3.371        | 3.581 | <b>3.18</b>  | 3.323        |
|            | 87  | 3.38  | 3.176        | <b>3.137</b> | 3.362        | 1.875        | 1.769 | <b>1.662</b> | 1.861        | 0.388        | 0.375        | <b>0.405</b> | 0.378        | 3.392        | 3.532 | <b>3.155</b> | 3.372        |
| OAK RIDGE  | 10  | 0.988 | 1.151        | 1.016        | <b>0.967</b> | 0.556        | 0.93  | 0.595        | <b>0.552</b> | <b>0.678</b> | 0.514        | 0.661        | 0.669        | 1.093        | 1.451 | 1.18         | <b>1.085</b> |
|            | 100 | 1.593 | 1.728        | <b>1.303</b> | 1.485        | 0.973        | 1.224 | <b>0.786</b> | 0.876        | 0.68         | 0.641        | <b>0.709</b> | 0.689        | 1.594        | 2.071 | <b>1.308</b> | 1.503        |
|            | 30  | 1.244 | 1.446        | 1.136        | <b>1.092</b> | 0.674        | 1.176 | 0.639        | <b>0.61</b>  | <b>0.659</b> | 0.508        | 0.649        | 0.653        | 1.341        | 1.867 | 1.245        | <b>1.17</b>  |
| OSU        | 34  | 1.761 | 1.793        | 1.619        | <b>1.571</b> | 1.605        | 1.97  | <b>1.494</b> | 1.585        | 0.635        | 0.629        | <b>0.638</b> | 0.632        | 2.383        | 2.698 | <b>2.21</b>  | 2.239        |
|            | 46  | 1.934 | 1.962        | 1.749        | <b>1.743</b> | 1.474        | 1.771 | <b>1.328</b> | 1.425        | 0.603        | 0.603        | <b>0.608</b> | 0.603        | 2.288        | 2.585 | <b>2.066</b> | 2.145        |
| PARK FALLS | 30  | 1.238 | 1.255        | 1.148        | <b>1.092</b> | 1.23         | 1.529 | <b>1.053</b> | 1.135        | <b>0.79</b>  | 0.745        | 0.789        | 0.784        | 1.726        | 1.941 | <b>1.542</b> | 1.573        |
| SEVEN MILE | 15  | 2.527 | 3.292        | 2.526        | <b>2.445</b> | 2.593        | 4.356 | <b>2.156</b> | 2.471        | 0.843        | 0.751        | 0.844        | <b>0.853</b> | 3.789        | 5.783 | <b>3.444</b> | 3.645        |
|            | 30  | 2.534 | 3.38         | 2.613        | <b>2.542</b> | 2.35         | 4.409 | <b>2.243</b> | 2.554        | 0.847        | 0.758        | 0.849        | <b>0.855</b> | 3.543        | 5.852 | <b>3.54</b>  | 3.754        |
| TROUTDALE  | 30  | 2.039 | 2.024        | <b>2.004</b> | 2.024        | 0.934        | 0.952 | 0.867        | <b>0.864</b> | 0.525        | 0.521        | <b>0.53</b>  | 0.502        | 2.039        | 2.051 | <b>2.011</b> | 2.041        |
| WASCO      | 30  | 2.178 | <b>2.052</b> | 2.145        | 2.239        | <b>1.685</b> | 2.226 | 1.715        | 1.761        | 0.701        | <b>0.733</b> | 0.701        | 0.678        | <b>2.734</b> | 3.174 | 2.796        | 2.864        |

**Note:** The values of the best-performing model for each station and metrics are in boldface.

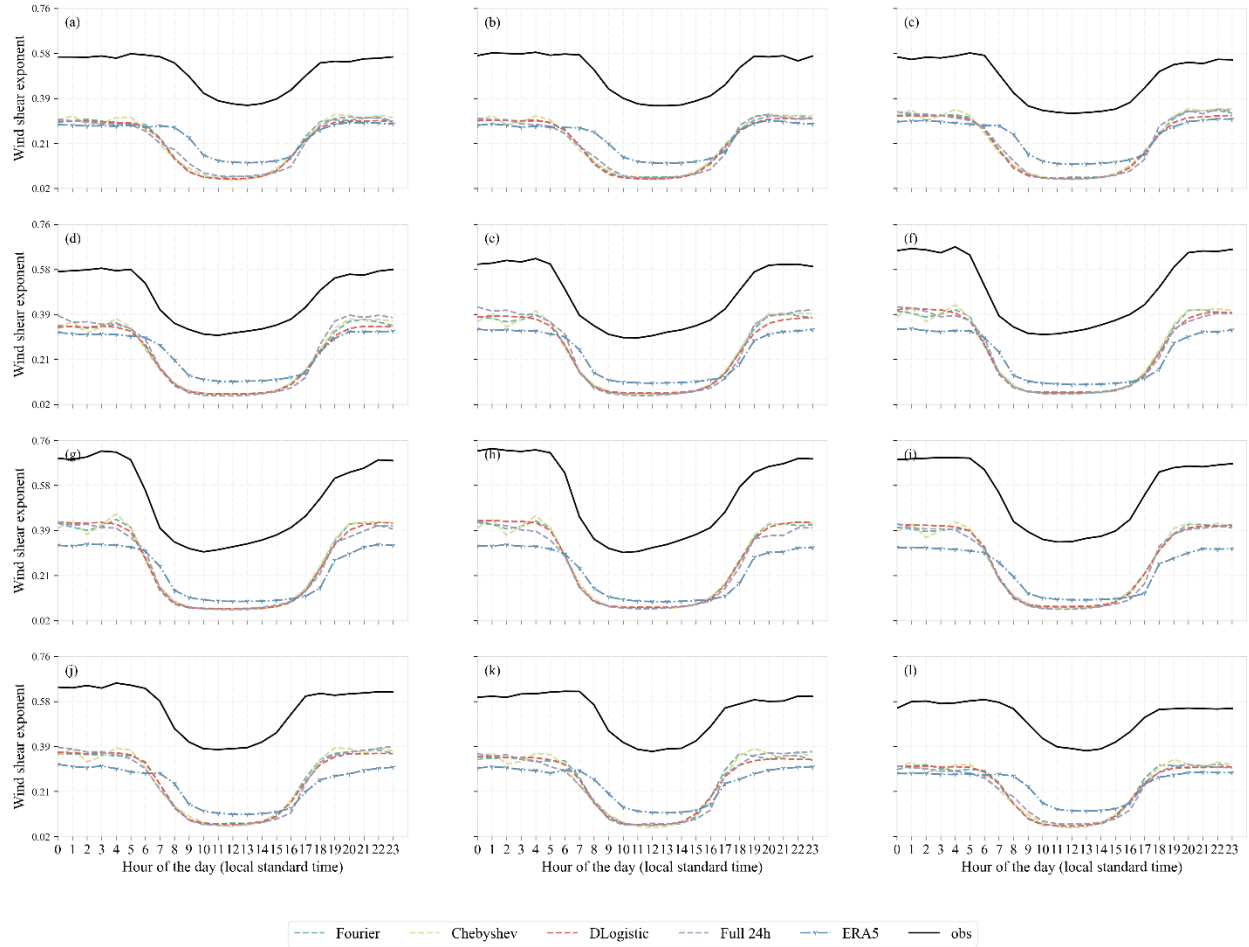

**Figure S3. Monthly diurnal cycle of wind shear between 10 m and 85 m AGL at BROOKHAVEN site.** Observations are compared with ERA5 and POWLIN-1L predictions (color-coded). The POWLIN-1L diurnal variability is represented using three formulations: Fourier series, Chebyshev series, and full 24h prediction. Panel (a) shows January, and the subsequent panels present the remaining months of the year.

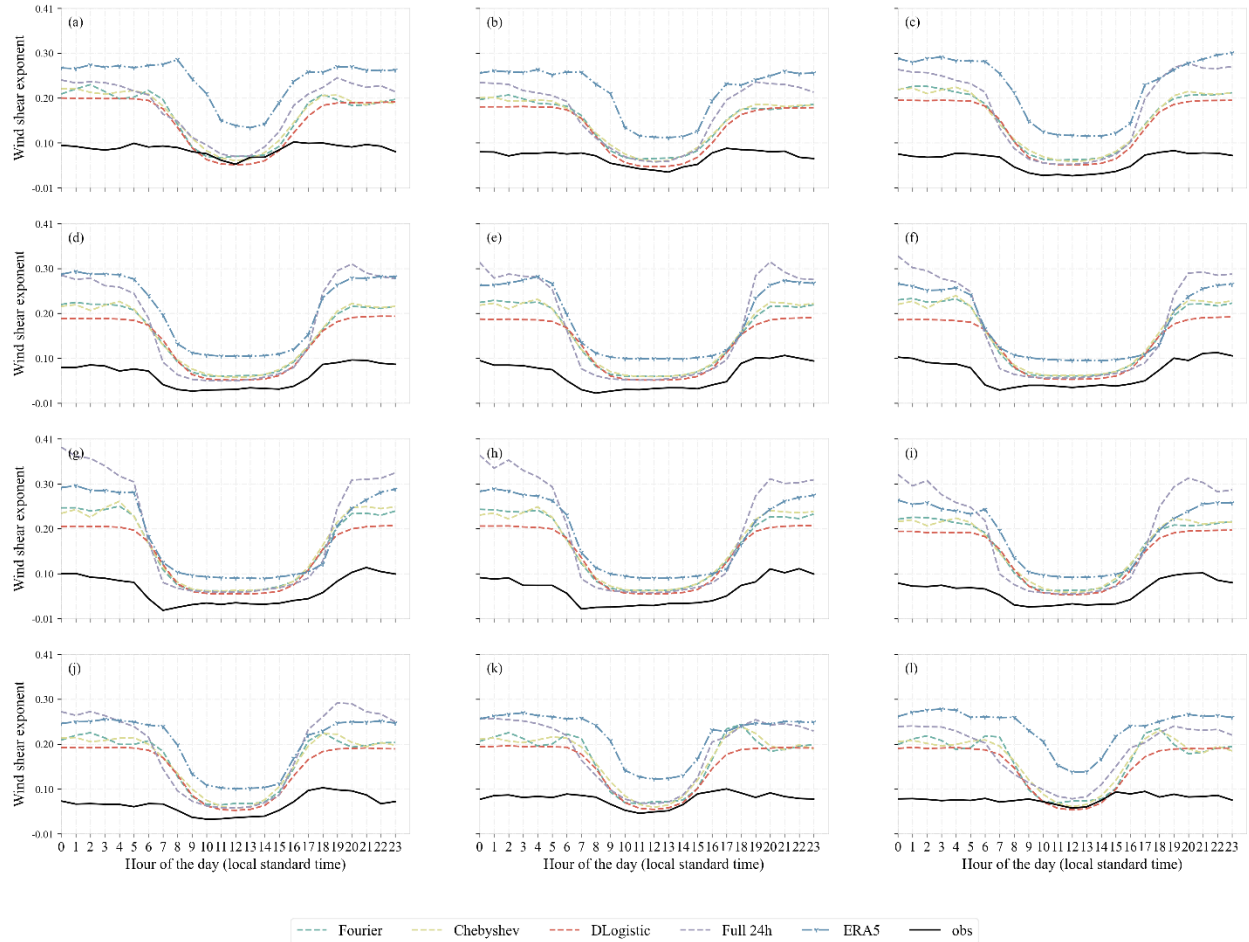

**Figure S4. Monthly diurnal cycle of wind shear between 31 m and 62 m AGL at BUTLER GRADE site.** Observations are compared with ERA5 and POWLIN-1L predictions (color-coded). The POWLIN-1L diurnal variability is represented using three formulations: Fourier series, Chebyshev series, and full 24h prediction. Panel (a) shows January, and the subsequent panels present the remaining months of the year.

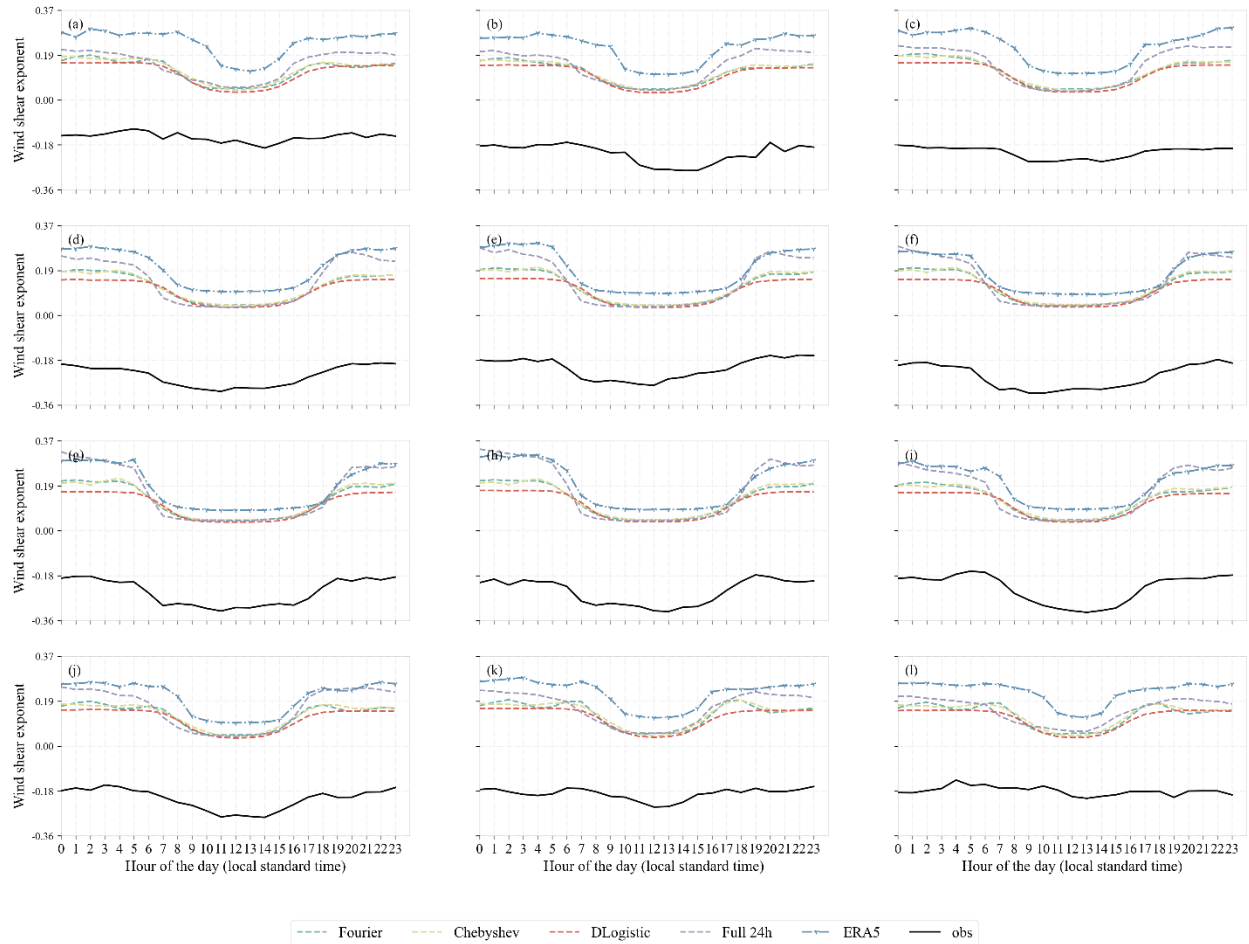

**Figure S5. Monthly diurnal cycle of wind shear between 24 m and 37 m AGL at KENNEWICK site.** Observations are compared with ERA5 and POWLIN-1L predictions (color-coded). The POWLIN-1L diurnal variability is represented using three formulations: Fourier series, Chebyshev series, and full 24h prediction. Panel (a) shows January, and the subsequent panels present the remaining months of the year.

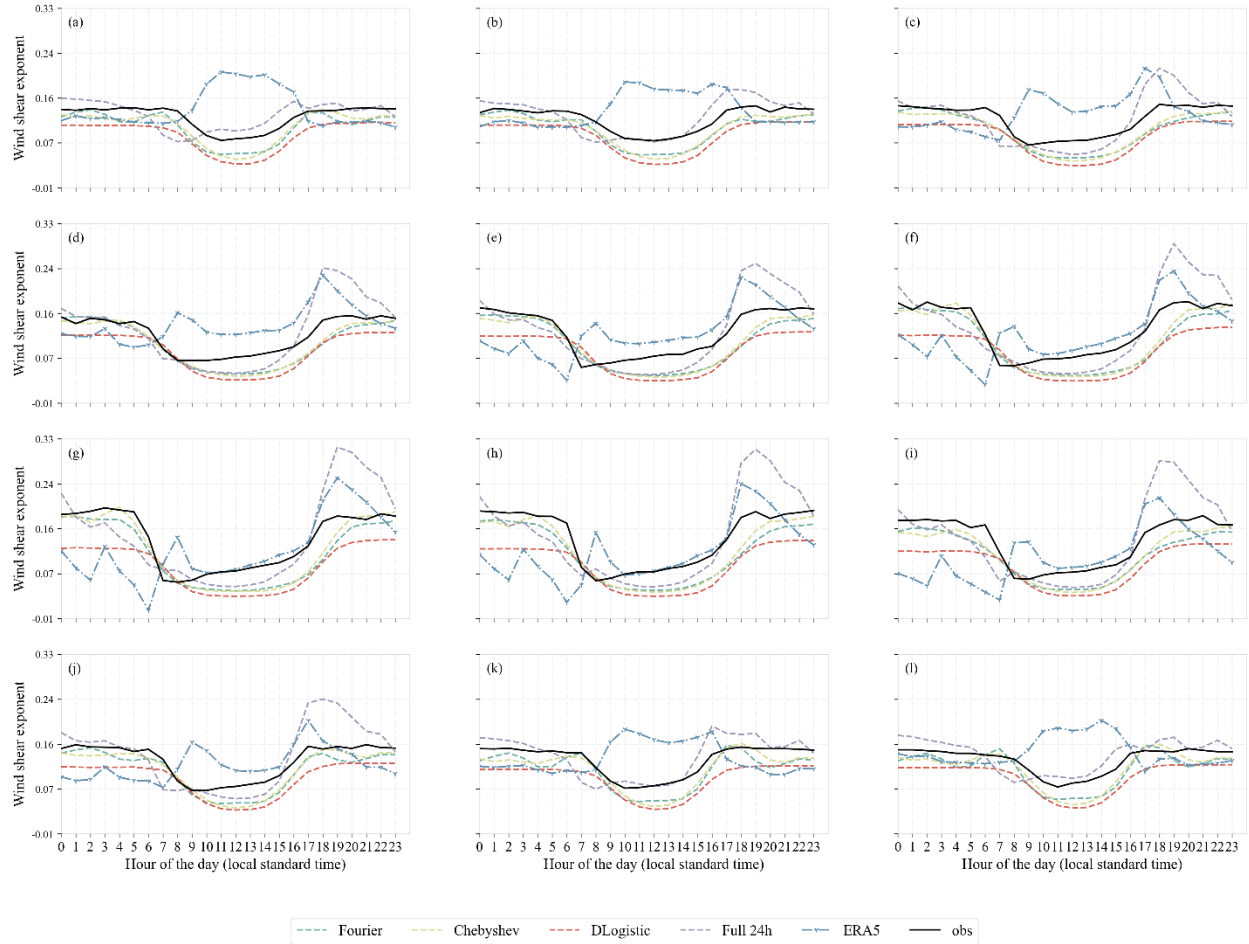

**Figure S6. Monthly diurnal cycle of wind shear between 10 m and 80 m AGL at NWTC M2 site.** Observations are compared with ERA5 and POWLIN-1L predictions (color-coded). The POWLIN-1L diurnal variability is represented using three formulations: Fourier series, Chebyshev series, and full 24h prediction. Panel (a) shows January, and the subsequent panels present the remaining months of the year.

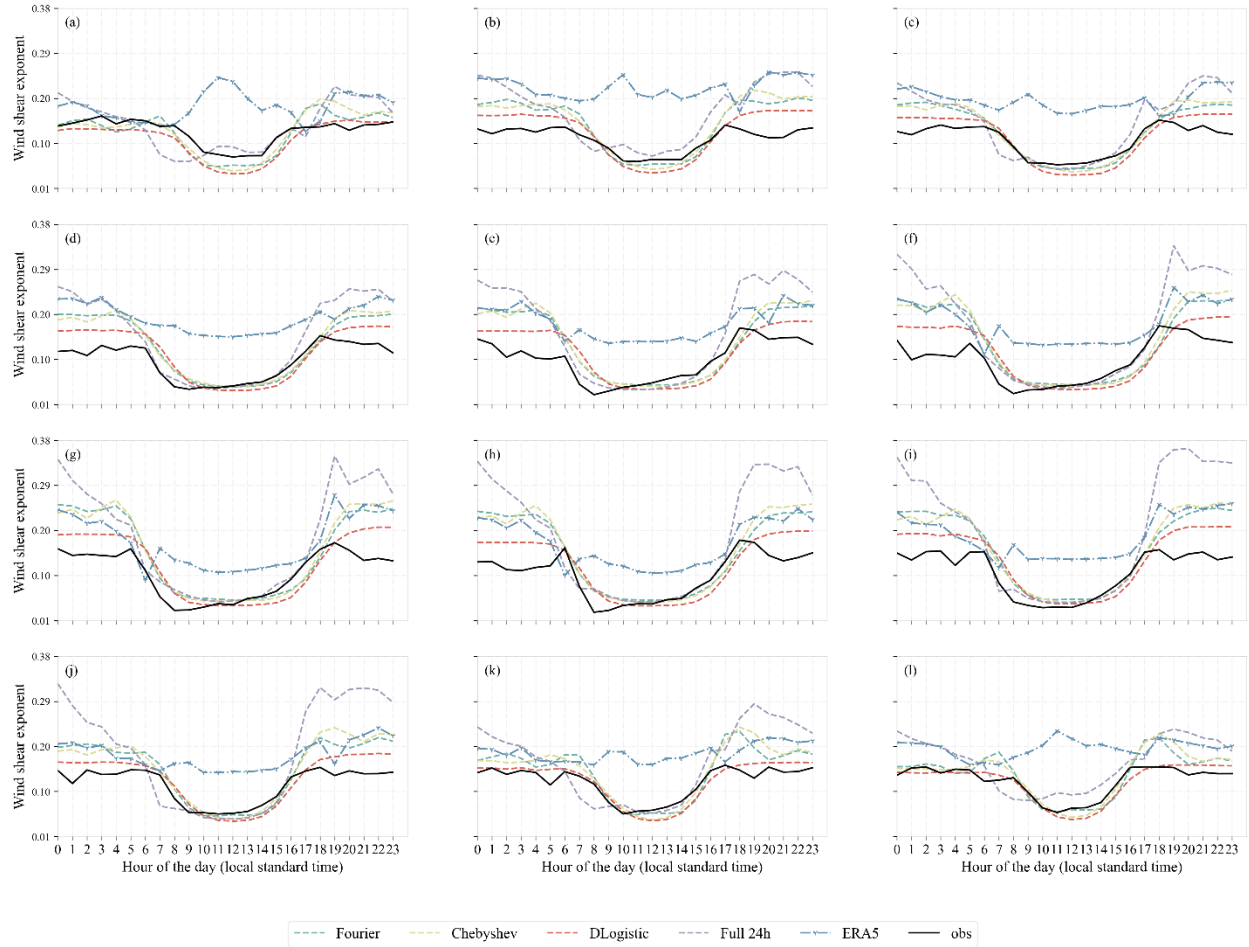

**Figure S7. Monthly diurnal cycle of wind shear between 10 m and 100 m AGL at NWTC M5 site.** Observations are compared with ERA5 and POWLIN-1L predictions (color-coded). The POWLIN-1L diurnal variability is represented using three formulations: Fourier series, Chebyshev series, and full 24h prediction. Panel (a) shows January, and the subsequent panels present the remaining months of the year.

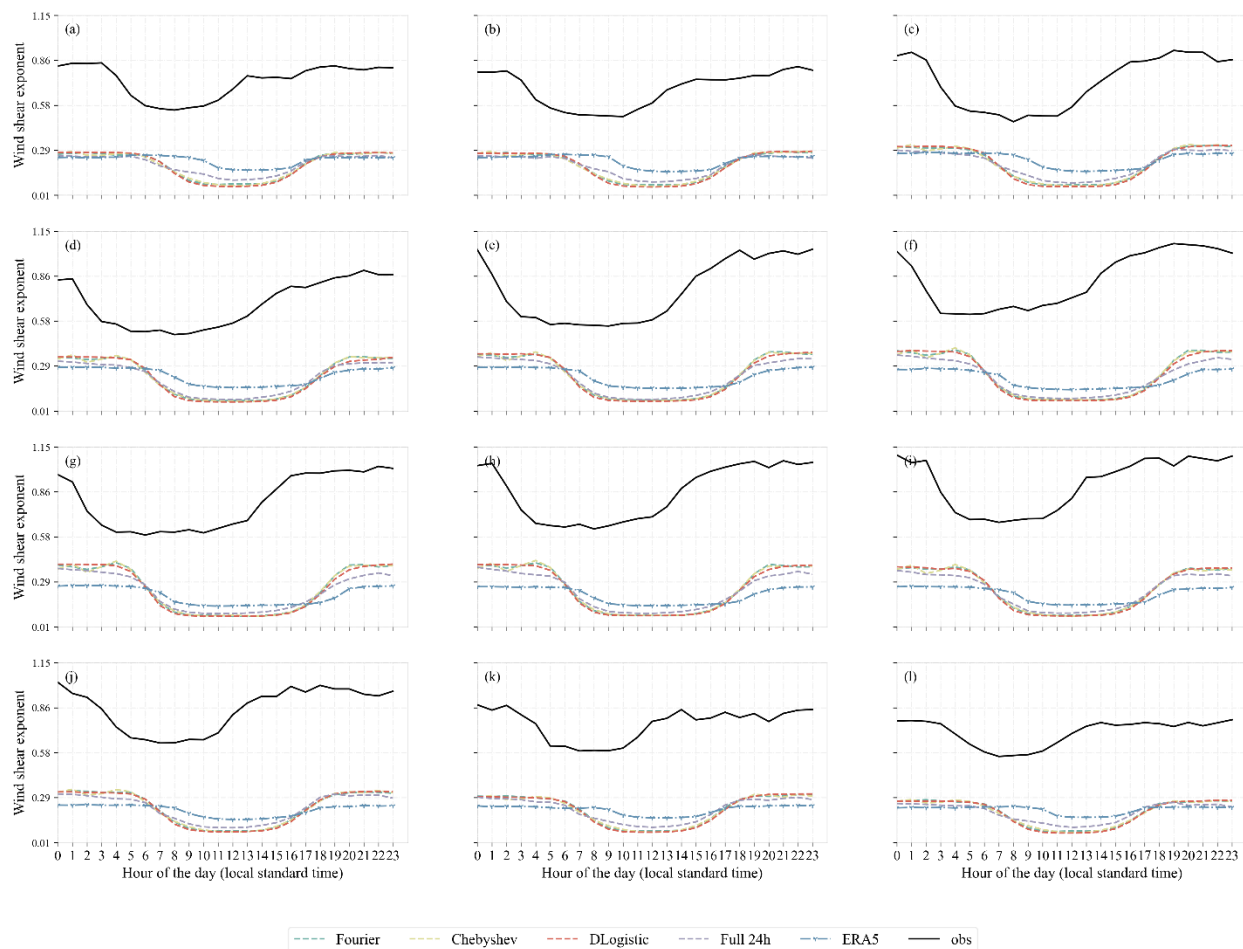

**Figure S8. Monthly diurnal cycle of wind shear between 34 m and 46 m AGL at OSU site.** Observations are compared with ERA5 and POWLIN-1L predictions (color-coded). The POWLIN-1L diurnal variability is represented using three formulations: Fourier series, Chebyshev series, and full 24h prediction. Panel (a) shows January, and the subsequent panels present the remaining months of the year.

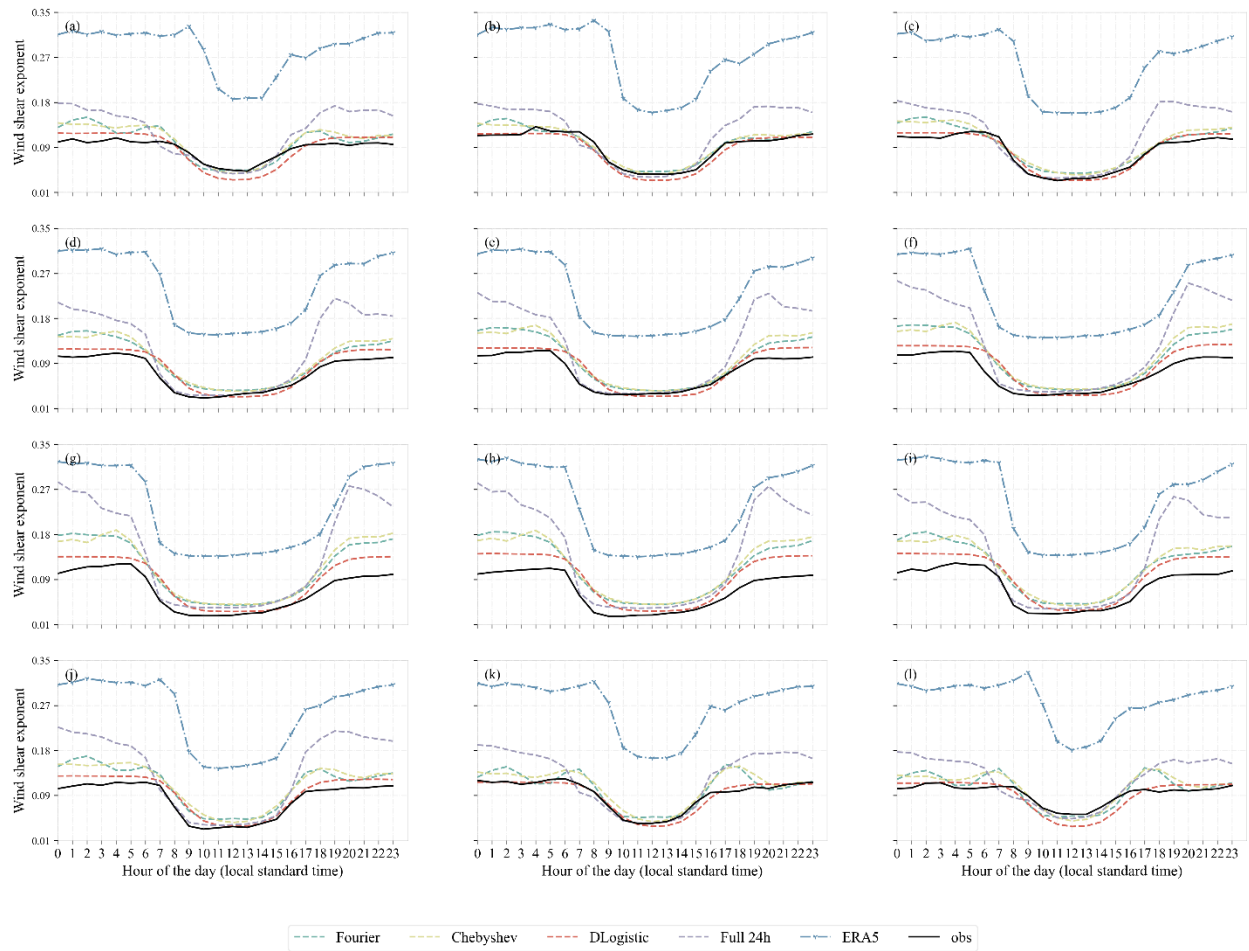

**Figure S9. Monthly diurnal cycle of wind shear between 15 m and 30 m AGL at SEVEN MILE site.** Observations are compared with ERA5 and POWLIN-1L predictions (color-coded). The POWLIN-1L diurnal variability is represented using three formulations: Fourier series, Chebyshev series, and full 24h prediction. Panel (a) shows January, and the subsequent panels present the remaining months of the year.
